# Supplementary material
Source: publisher figshare collection journal article supplement (https://tandf.figshare.com/articles/dataset/_/5657293)
Supplement: Supplementary file 1 [file 1]

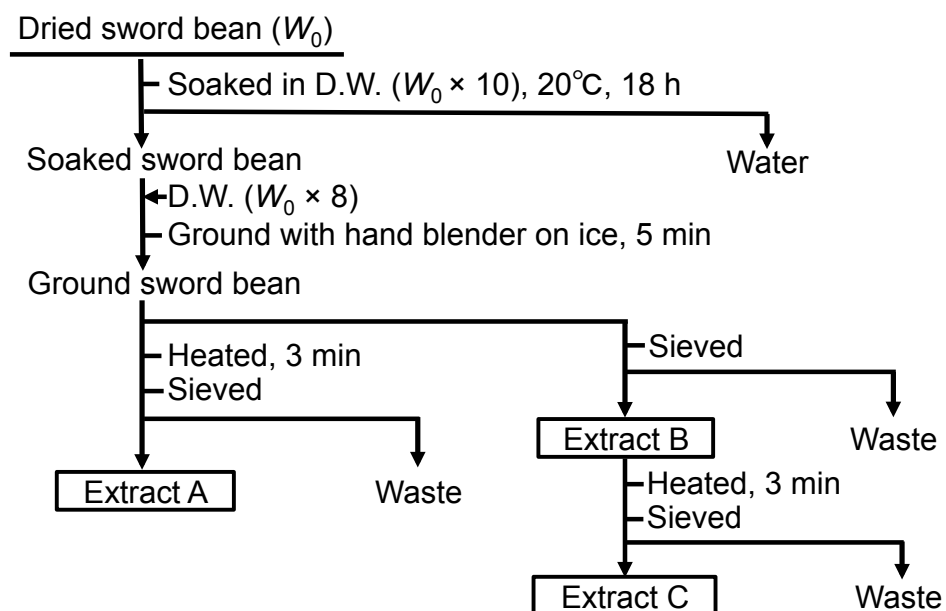

Supplemental Fig. 1. Experimental scheme for preparation of sword bean extracts.  $W_0$  shows the initial weight of dried sword beans. Boxes show the sword bean extracts.

Supplemental Fig. 1. Nishizawa and Arii
