# Supplementary material
Source: publisher figshare collection journal article supplement (https://tandf.figshare.com/articles/dataset/_/5657293)
Supplement: Supplementary file 2 [file 1]

Archive with 2 entries (2 files):
- tbbb_a_1403884_sm4094.pdf
- tbbb_a_1403884_sm4093.pdf
