# Supplementary material
Source: publisher figshare collection journal article supplement (https://tandf.figshare.com/articles/dataset/_/5657293)
Supplement: Supplementary file 2 [file 1 › tbbb_a_1403884_sm4094.pdf]

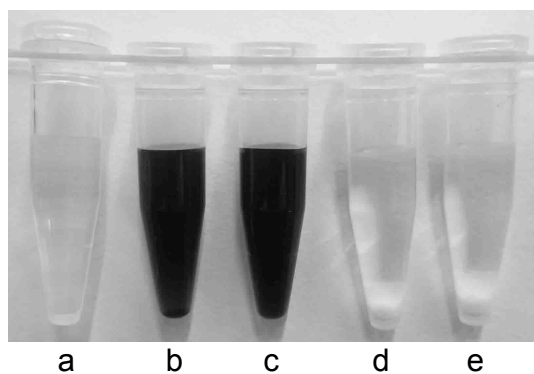

Supplemental Fig. 2. Iodo-starch reaction to starch and cellulose. Distilled water (a) was used as a control. A suspension of 1% starch (b) was incubated at 100°C for 3 min (c). The unboiled 1% starch (b) gave a similar result to that obtained with the same suspension in the test depicted in Fig. 8, e. A suspension of 1% cellulose was also tested with (e) or without (d) heating.

Supplemental Fig. 2. Nishizawa and Arii
